# Supplementary material for: A purely bioinformatic pipeline for the prediction of mammalian odorant receptor gene enhancers
Source: PubMed Central journal article supplement (PMC6744719; doi:10.1186/s12859-019-3012-1), 2019-09-14
Supplement: 12859_2019_3012_MOESM8_ESM.pdf [file 12859_2019_3012_MOESM8_ESM.pdf]

Supplementary Table S1

| List                             | Cluster number (of which mixed) | Minicluster number | Solitary gene number (of which pseudogenes ) | Minicluster identity and genes                                                                                                                                                                                                                                                                                                                                                                                                                                                                                                                                                                                                                                     | Solitary gene identity                                                                                                                                                                                                                                                                                                                                                                                                                                                                                                                                                                                                                  |
|----------------------------------|---------------------------------|--------------------|----------------------------------------------|--------------------------------------------------------------------------------------------------------------------------------------------------------------------------------------------------------------------------------------------------------------------------------------------------------------------------------------------------------------------------------------------------------------------------------------------------------------------------------------------------------------------------------------------------------------------------------------------------------------------------------------------------------------------|-----------------------------------------------------------------------------------------------------------------------------------------------------------------------------------------------------------------------------------------------------------------------------------------------------------------------------------------------------------------------------------------------------------------------------------------------------------------------------------------------------------------------------------------------------------------------------------------------------------------------------------------|
| MOE mouse<br>0.1 Mb<br>threshold | 61 (0)                          | 9                  | 31 (14)                                      | cluster12 (chr6:40542171-40574343), [ <i>Olfir461</i> , <i>Olfir460</i> ]; cluster18 (chr7:84853553-84920861), [ <i>Olfir291</i> , <i>Olfir290</i> ]; cluster20 (chr7:99730273-99769321), [ <i>Olfir520</i> , <i>Olfir521</i> ]; cluster33 (chr10:78517428-78618074), [ <i>Olfir1358</i> , <i>Olfir1357</i> ]; cluster46 (chr13:65138089-65156152), [ <i>Olfir465-ps1</i> , <i>Olfir466</i> ]; cluster47 (chr14:14322828-14410095), [ <i>Olfir31</i> , <i>Olfir721-ps1</i> ]; cluster58 (chr19:12670439-12683851), [ <i>Olfir1442</i> , <i>Olfir1443</i> ]; cluster60 (chrX:49672333-49735059), [ <i>Olfir1320</i> , <i>Olfir1321</i> ]; cluster61 (chrX:74569153- | <i>Olfir15</i> , <i>Olfir16</i> , <i>Olfir19</i> , <i>Olfir49</i> , <i>Olfir210-ps1</i> , <i>Olfir221</i> , <i>Olfir241-ps1</i> , <i>Olfir266</i> , <i>Olfir267</i> , <i>Olfir277-ps1</i> , <i>Olfir289-ps1</i> , <i>Olfir369-ps1</i> , <i>Olfir370</i> , <i>Olfir371</i> , <i>Olfir375-ps1</i> , <i>Olfir459</i> , <i>Olfir717-ps1</i> , <i>Olfir718-ps1</i> , <i>Olfir719-ps</i> , <i>Olfir720</i> , <i>Olfir750</i> , <i>Olfir752-ps1</i> , <i>Olfir1322</i> , <i>Olfir1323</i> , <i>Olfir1324</i> , <i>Olfir1367</i> , <i>Olfir1397-ps1</i> , <i>Olfir1398-ps1</i> , <i>Olfir1401-ps1</i> , <i>Olfir1402</i> , <i>Olfir1556-ps1</i> |

|                                  |        |   |         |                                                                                                                                                                                                                                                                                                                                                                                     |                                                                                                                                                                                                                                                                                                                                                                                                                                                                                                                   |
|----------------------------------|--------|---|---------|-------------------------------------------------------------------------------------------------------------------------------------------------------------------------------------------------------------------------------------------------------------------------------------------------------------------------------------------------------------------------------------|-------------------------------------------------------------------------------------------------------------------------------------------------------------------------------------------------------------------------------------------------------------------------------------------------------------------------------------------------------------------------------------------------------------------------------------------------------------------------------------------------------------------|
|                                  |        |   |         | 74597578), [ <i>Olfr1326-ps1</i> , <i>Olfr1325</i> ]                                                                                                                                                                                                                                                                                                                                |                                                                                                                                                                                                                                                                                                                                                                                                                                                                                                                   |
| MOE mouse<br>0.2 Mb<br>threshold | 50 (0) | 5 | 26 (14) | cluster10 (chr6:40542171-40574343), [ <i>Olfr461</i> , <i>Olfr460</i> ]; cluster14 (chr7:84853553-84920861), [ <i>Olfr291</i> , <i>Olfr290</i> ]; cluster16 (chr7:99730273-99769321), [ <i>Olfr520</i> , <i>Olfr521</i> ]; cluster26 (chr10:78517428-78618074), [ <i>Olfr1358</i> , <i>Olfr1357</i> ]; cluster38 (chr13:65138089-65156152), [ <i>Olfr465-ps1</i> , <i>Olfr466</i> ] | <i>Olfr15</i> , <i>Olfr19</i> , <i>Olfr49</i> , <i>Olfr210-ps1</i> , <i>Olfr221</i> , <i>Olfr241-ps1</i> , <i>Olfr266</i> , <i>Olfr267</i> , <i>Olfr277-ps1</i> , <i>Olfr289-ps1</i> , <i>Olfr369-ps1</i> , <i>Olfr370</i> , <i>Olfr371</i> , <i>Olfr375-ps1</i> , <i>Olfr459</i> , <i>Olfr717-ps1</i> , <i>Olfr718-ps1</i> , <i>Olfr719-ps</i> , <i>Olfr750</i> , <i>Olfr752-ps1</i> , <i>Olfr1324</i> , <i>Olfr1397-ps1</i> , <i>Olfr1398-ps1</i> , <i>Olfr1401-ps1</i> , <i>Olfr1402</i> , <i>Olfr1556-ps1</i> |
| MOE mouse<br>0.5 Mb<br>threshold | 46 (0) | 4 | 22 (14) | cluster10 (chr6:40542171-40574343), [ <i>Olfr461</i> , <i>Olfr460</i> ]; cluster14 (chr7:84853553-84920861), [ <i>Olfr291</i> , <i>Olfr290</i> ]; cluster16 (chr7:99730273-99769321), [ <i>Olfr520</i> , <i>Olfr521</i> ]; cluster35 (chr13:65138089-65156152), [ <i>Olfr465-ps1</i> , <i>Olfr466</i> ]                                                                             | <i>Olfr19</i> , <i>Olfr49</i> , <i>Olfr210-ps1</i> , <i>Olfr241-ps1</i> , <i>Olfr266</i> , <i>Olfr267</i> , <i>Olfr277-ps1</i> , <i>Olfr289-ps1</i> , <i>Olfr369-ps1</i> , <i>Olfr370</i> , <i>Olfr371</i> , <i>Olfr375-ps1</i> , <i>Olfr459</i> , <i>Olfr717-ps1</i> , <i>Olfr718-ps1</i> , <i>Olfr719-ps</i> , <i>Olfr752-ps1</i> , <i>Olfr1397-ps1</i> , <i>Olfr1398-ps1</i> , <i>Olfr1401-ps1</i> , <i>Olfr1402</i> , <i>Olfr1556-ps1</i>                                                                     |
| MOE mouse<br>1 Mb<br>threshold   | 42 (0) | 4 | 21 (14) | cluster9 (chr6:40542171-40574343), [ <i>Olfr461</i> , <i>Olfr460</i> ]; cluster13 (chr7:84853553-84920861), [ <i>Olfr291</i> , <i>Olfr290</i> ]; cluster15 (chr7:99730273-                                                                                                                                                                                                          | <i>Olfr19</i> , <i>Olfr49</i> , <i>Olfr210-ps1</i> , <i>Olfr241-ps1</i> , <i>Olfr266</i> , <i>Olfr267</i> , <i>Olfr277-ps1</i> , <i>Olfr289-ps1</i> , <i>Olfr369-ps1</i> , <i>Olfr370</i> , <i>Olfr371</i> , <i>Olfr375-ps1</i> , <i>Olfr717-ps1</i> , <i>Olfr718-ps1</i> , <i>Olfr719-ps</i> ,                                                                                                                                                                                                                   |

|                                    |                                                   |   |                     |                                                                                                                                                                                                                                                                                                                                                                                                                                                      |                                                                                                                                                                                                                                                                                                                                                                                                                                                                                                                                                                                                                                                                                                                            |
|------------------------------------|---------------------------------------------------|---|---------------------|------------------------------------------------------------------------------------------------------------------------------------------------------------------------------------------------------------------------------------------------------------------------------------------------------------------------------------------------------------------------------------------------------------------------------------------------------|----------------------------------------------------------------------------------------------------------------------------------------------------------------------------------------------------------------------------------------------------------------------------------------------------------------------------------------------------------------------------------------------------------------------------------------------------------------------------------------------------------------------------------------------------------------------------------------------------------------------------------------------------------------------------------------------------------------------------|
|                                    |                                                   |   |                     | 99769321), [ <i>Olf</i> r520, <i>Olf</i> r521]; cluster32 (chr13:65138089-65156152), [ <i>Olf</i> r465- <i>ps</i> 1, <i>Olf</i> r466]                                                                                                                                                                                                                                                                                                                | <i>Olf</i> r752- <i>ps</i> 1, <i>Olf</i> r1397- <i>ps</i> 1, <i>Olf</i> r1398- <i>ps</i> 1, <i>Olf</i> r1401- <i>ps</i> 1, <i>Olf</i> r1402, <i>Olf</i> r1556- <i>ps</i> 1                                                                                                                                                                                                                                                                                                                                                                                                                                                                                                                                                 |
| NO-PSEUDO MOE mouse 1 Mb threshold | 41 (0)                                            | 6 | 8 (0 by definition) | cluster9 (chr6:40542171-40574343), [ <i>Olf</i> r461, <i>Olf</i> r460]; cluster13 (chr7:84853553-84920861), [ <i>Olf</i> r291, <i>Olf</i> r290]; cluster15 (chr7:99730273-99769321), [ <i>Olf</i> r520, <i>Olf</i> r521]; cluster27 (chr11:52144593-52213987), [ <i>Olf</i> r1373, <i>Olf</i> r1371]; cluster32 (chr14:14171738-14331791), [ <i>Olf</i> r720, <i>Olf</i> r31]; cluster35 (chr16:3591042-3844747), [ <i>Olf</i> r161, <i>Olf</i> r15] | <i>Olf</i> r19, <i>Olf</i> r49, <i>Olf</i> r266, <i>Olf</i> r267, <i>Olf</i> r370, <i>Olf</i> r371, <i>Olf</i> r466, <i>Olf</i> r1402                                                                                                                                                                                                                                                                                                                                                                                                                                                                                                                                                                                      |
| Olfactome mouse 1 Mb threshold     | 59 (9, of which 1 FPR/VR-mixed and 8 OR/VR-mixed) | 4 | 35 (23)             | cluster12 (chr4:156331103-156354578), [ <i>Vmn</i> 2r- <i>ps</i> 159, <i>Vmn</i> 2r125]; cluster16 (chr6:40542171-40574343), [ <i>Olf</i> r461, <i>Olf</i> r460]; cluster28 (chr7:99730273-99769321), [ <i>Olf</i> r520, <i>Olf</i> r521]; cluster45 (chr13:65138089-65156152), [ <i>Olf</i> r465- <i>ps</i> 1, <i>Olf</i> r466]                                                                                                                     | <i>Olf</i> r19, <i>Olf</i> r49, <i>Olf</i> r210- <i>ps</i> 1, <i>Olf</i> r241- <i>ps</i> 1, <i>Olf</i> r266, <i>Olf</i> r267, <i>Olf</i> r277- <i>ps</i> 1, <i>Olf</i> r289- <i>ps</i> 1, <i>Olf</i> r369- <i>ps</i> 1, <i>Olf</i> r370, <i>Olf</i> r371, <i>Olf</i> r375- <i>ps</i> 1, <i>Olf</i> r717- <i>ps</i> 1, <i>Olf</i> r718- <i>ps</i> 1, <i>Olf</i> r719- <i>ps</i> , <i>Olf</i> r1397- <i>ps</i> 1, <i>Olf</i> r1398- <i>ps</i> 1, <i>Olf</i> r1401- <i>ps</i> 1, <i>Olf</i> r1402, <i>Olf</i> r1556- <i>ps</i> 1, <i>V1rg</i> 10, <i>Vmn</i> 1r90, <i>Vmn</i> 1r239- <i>ps</i> , <i>Vmn</i> 1r- <i>ps</i> 1, <i>Vmn</i> 2r118, <i>Vmn</i> 2r120, <i>Vmn</i> 2r121, <i>Vmn</i> 2r- <i>ps</i> 2, <i>Vmn</i> 2r- |

|                                    |                                                                                              |    |        |                                                                                                                                                                                                                                                                                                                                                                                                                                                                                                                                                                                                                                                                                                                                                          |                                                                                                                                                                                            |
|------------------------------------|----------------------------------------------------------------------------------------------|----|--------|----------------------------------------------------------------------------------------------------------------------------------------------------------------------------------------------------------------------------------------------------------------------------------------------------------------------------------------------------------------------------------------------------------------------------------------------------------------------------------------------------------------------------------------------------------------------------------------------------------------------------------------------------------------------------------------------------------------------------------------------------------|--------------------------------------------------------------------------------------------------------------------------------------------------------------------------------------------|
|                                    |                                                                                              |    |        |                                                                                                                                                                                                                                                                                                                                                                                                                                                                                                                                                                                                                                                                                                                                                          | <i>ps24, Vmn2r-ps61, Vmn2r-ps88, Vmn2r-ps89, Vmn2r-ps94, Vmn2r-ps104, Vmn2r-ps139</i>                                                                                                      |
| Olfactome rat<br>1 Mb<br>threshold | 72 (9, of<br>which 2<br>FPR/VR-<br>mixed, 1<br>FPR/OR/VR<br>-mixed and 6<br>OR/VR-<br>mixed) | 17 | 19 (1) | cluster1 (chr1:744616-813517), [ <i>Vom2r6, Vom2r5</i> ]; cluster7 (chr1:116152667-116885644), [ <i>Fpr3, Vom2r25</i> ]; cluster9 (chr1:164705604-164756039), [ <i>Olr36, Olr37</i> ]; cluster18 (chr2:168228099-168260536), [ <i>Vom1r56, Vom1r55</i> ]; cluster25 (chr4:13564879-13645351), [ <i>Olr987, Olr990</i> ]; cluster28 (chr4:119398198-119466491), [ <i>Vom1r101, Vom1r102</i> ]; cluster33 (chr5:64614755-64622360), [ <i>LOC500460, Olr841</i> ]; cluster43 (chr9:7643533-7815144), [ <i>Vom2r76, Vom2r77</i> ]; cluster45 (chr9:101222846-101269843), [ <i>Vom1r64, Olr178</i> ]; cluster52 (chr10:75186572-75202030), [ <i>Olr1521, Olr1522</i> ]; cluster54 (chr11:23057512-23063414), [ <i>LOC103693533, LOC103690036</i> ]; cluster57 | <i>LOC100909435, LOC100912028, LOC103693627, Olr390, Olr392, Olr799, Olr854, Olr1646, Olr1667, Vom1r26, Vom1r50, Vom1r70, Vom1r89, Vom2r9, Vom2r38, Vom2r49, Vom2r57, Vom2r75, Vom2r79</i> |

|                                |                                                    |    |         |                                                                                                                                                                                                                                                                                                                                                                                                                                                                                                            |                                                                                                                                                                                                                                                                                                                                                                                                                                                                                                                                                                                                                                                            |
|--------------------------------|----------------------------------------------------|----|---------|------------------------------------------------------------------------------------------------------------------------------------------------------------------------------------------------------------------------------------------------------------------------------------------------------------------------------------------------------------------------------------------------------------------------------------------------------------------------------------------------------------|------------------------------------------------------------------------------------------------------------------------------------------------------------------------------------------------------------------------------------------------------------------------------------------------------------------------------------------------------------------------------------------------------------------------------------------------------------------------------------------------------------------------------------------------------------------------------------------------------------------------------------------------------------|
|                                |                                                    |    |         | (chr11:55474820-55498163), [ <i>Olr1453</i> , LOC108348268]; cluster60 (chr12:19753207-21077539), [ <i>Vom2r62</i> , <i>Vom2r64</i> ]; cluster61 (chr13:9464906-9480933), [LOC100910928, LOC100910887]; cluster67 (chr17:2690062-2705123), [ <i>Olr1653</i> , <i>Olr1652</i> ]; cluster69 (chr19:27534854-28378118), [ <i>Olr1666</i> , <i>Vom1r21</i> ]; cluster71 (chrX:95344825-95353344), [ <i>Olr10</i> , <i>Olr11</i> ]                                                                              |                                                                                                                                                                                                                                                                                                                                                                                                                                                                                                                                                                                                                                                            |
| Olfactome human 1 Mb threshold | 65 (7, of which 1 OR/TAAR-mixed and 6 OR/VR-mixed) | 15 | 38 (34) | cluster2 (chr1:147419050-147446133), [ <i>OR13ZIP</i> , <i>OR13Z2P</i> ]; cluster8 (chr3:13926813-14089871), [ <i>VNIR20P</i> , <i>VNIR21P</i> ]; cluster9 (chr3:75356516-75599673), [ <i>OR7E22P</i> , <i>OR7E121P</i> ]; cluster16 (chr7:56559221-57423725), [ <i>VNIR25P</i> , <i>VNIR28P</i> ]; cluster18 (chr7:97946987-97967074), [ <i>OR7E7P</i> , <i>OR7E38P</i> ]; cluster24 (chr9:38504447-39039594), [ <i>VNIR48P</i> , <i>VN2R3P</i> ]; cluster29 (chr10:45258185-45315608), [ <i>OR6D1P</i> , | <i>ORIX1P</i> , <i>ORIX5P</i> , <i>OR2AE1</i> , <i>OR2AL1P</i> , <i>OR2BH1P</i> , <i>OR2K2</i> , <i>OR4F1P</i> , <i>OR4F2P</i> , <i>OR4F7P</i> , <i>OR4F21</i> , <i>OR5M14P</i> , <i>OR6R2P</i> , <i>OR7A19P</i> , <i>OR7E14P</i> , <i>OR7E23P</i> , <i>OR7E94P</i> , <i>OR7E100P</i> , <i>OR7E101P</i> , <i>OR7E102P</i> , <i>OR7E122P</i> , <i>OR7E129P</i> , <i>OR7E136P</i> , <i>OR7H2P</i> , <i>OR7K1P</i> , <i>OR8R1P</i> , <i>OR11H1</i> , <i>OR11H1P</i> , <i>VNIR7P</i> , <i>VNIR9P</i> , <i>VNIR46P</i> , <i>VNIR51P</i> , <i>VNIR53P</i> , <i>VNIR54P</i> , <i>VNIR96P</i> , <i>VNIR108P</i> , <i>VNIR110P</i> , <i>VN2R1P</i> , <i>VN2R10P</i> |

|  |  |  |  |                                                                                                                                                                                                                                                                                                                                                                                                                                                                                                                                                                                                       |  |
|--|--|--|--|-------------------------------------------------------------------------------------------------------------------------------------------------------------------------------------------------------------------------------------------------------------------------------------------------------------------------------------------------------------------------------------------------------------------------------------------------------------------------------------------------------------------------------------------------------------------------------------------------------|--|
|  |  |  |  | <p>OR13A1]; cluster35 (chr11:67735608-67975243), [<i>OR7E11P</i>, <i>OR7E1P</i>]; cluster38 (chr11:86832540-86857947), [<i>OR7E13P</i>, <i>OR7E2P</i>]; cluster41 (chr12:52079696-52092285), [<i>OR7E47P</i>, <i>OR7E47P</i>]; cluster44 (chr13:63742341-63837456), [<i>OR7E156P</i>, <i>OR7E104P</i>]; cluster45 (chr13:67902208-67911951), [<i>OR7E111P</i>, <i>OR7E33P</i>]; cluster48 (chr15:20960675-20970215), [<i>OR11J2P</i>, <i>OR11J5P</i>]; cluster54 (chr17:58155133-58170579), [<i>OR4D1</i>, <i>OR4D2</i>]; cluster62 (chr19:54320204-54648853), [<i>VNIR104P</i>, <i>VNIR105P</i>]</p> |  |
|--|--|--|--|-------------------------------------------------------------------------------------------------------------------------------------------------------------------------------------------------------------------------------------------------------------------------------------------------------------------------------------------------------------------------------------------------------------------------------------------------------------------------------------------------------------------------------------------------------------------------------------------------------|--|
